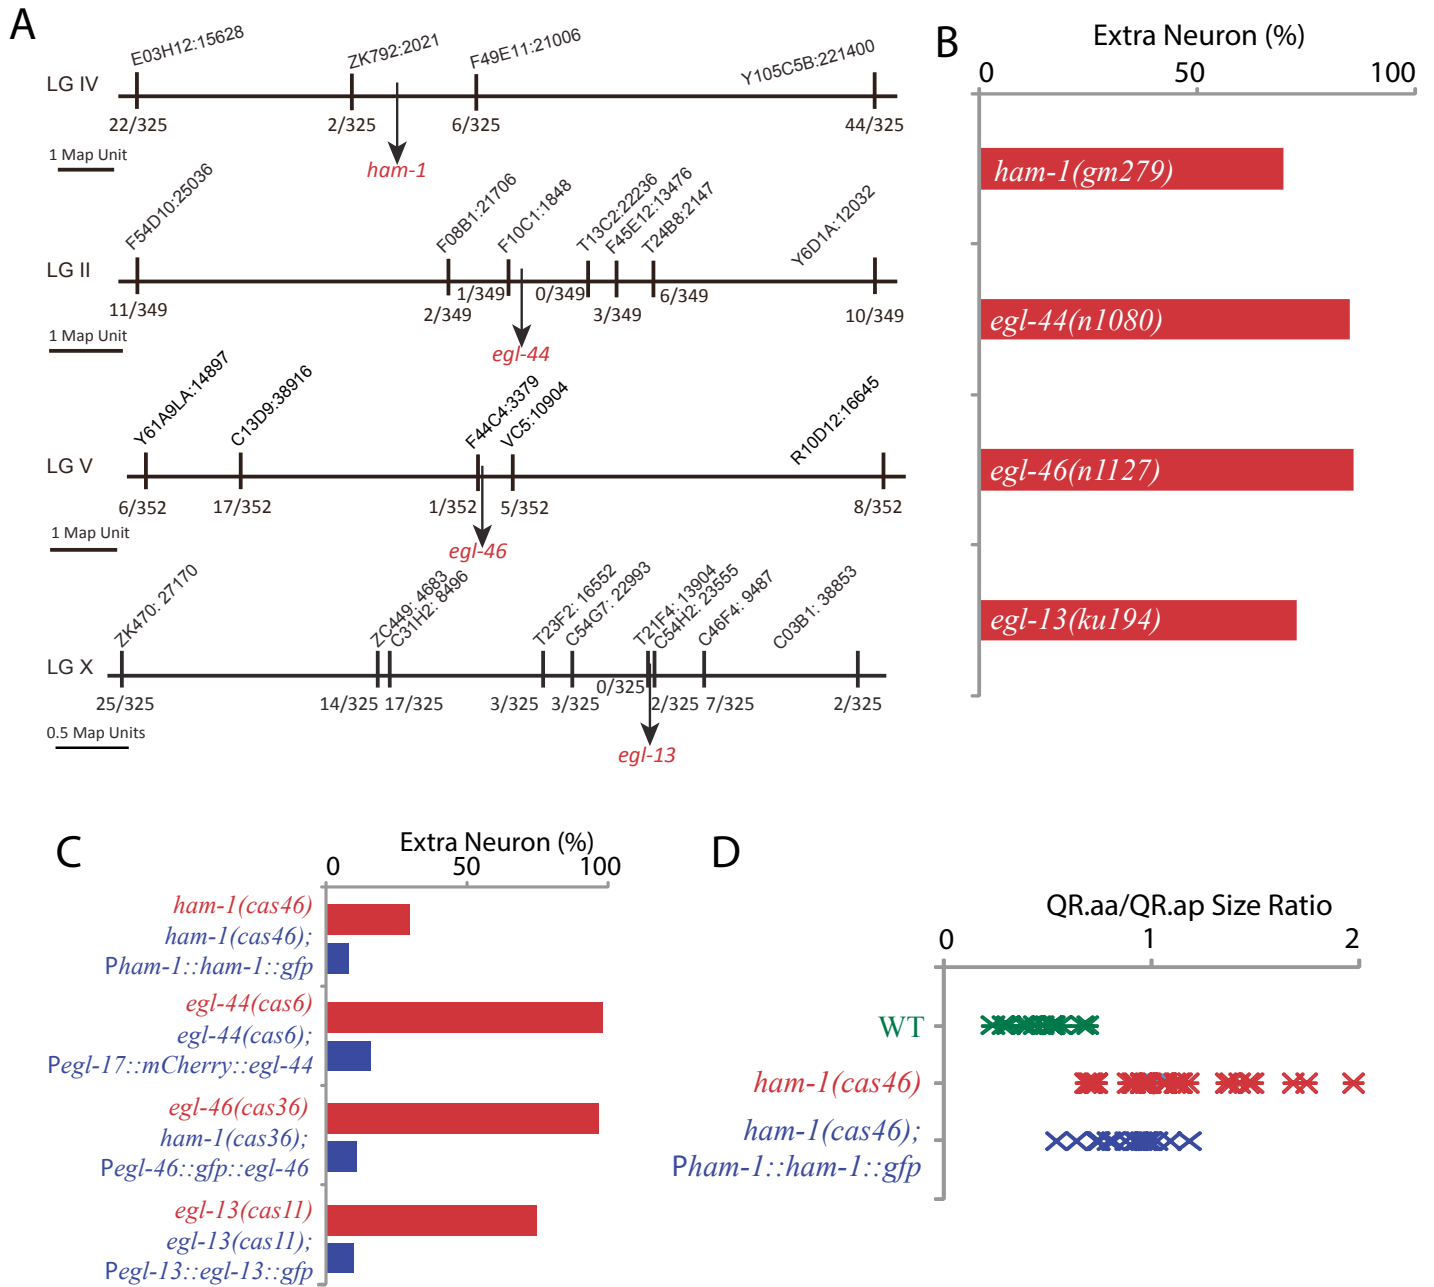

**Fig. S1. *ham-1*, *egl-44*, *egl-46* and *egl-13* cloning.** (A) Snip-SNP markers (top) and number of recombinants (bottom) of each gene are shown. (B) Extra neuron phenotypes in the canonical alleles. (C) Rescue of extra neuron phenotypes using GFP- or mCherry-tagged HAM-1, EGL-44, EGL-46 and EGL-13. (D) Rescue of daughter cell size asymmetry in *ham-1* mutants by *Pham-1::ham-1::gfp*. In WT animals, Q.aa is half the size of Q.ap. In *ham-1* mutants, Q.aa was 1.1-fold larger than Q.ap, and *Pham-1::ham-1::gfp* reduced the Q.aa/Q.ap ratio to 0.9.

A

## Homologues of HAM-1, EGL-44, EGL-46 and EGL-13

| <i>C. elegans</i> | <i>D. melanogaster</i> |         | <i>M. musculus</i>                    |         | <i>H. sapiens</i>                     |         |
|-------------------|------------------------|---------|---------------------------------------|---------|---------------------------------------|---------|
|                   | Protein Name           |         | Protein Name                          |         | Protein Name                          |         |
|                   | ID                     | E Value | ID                                    | E Value | ID                                    | E Value |
| HAM-1             | ko-PA                  |         | Storkhead-box protein 1               |         | Storkhead-box protein 1               |         |
|                   | CG10573                | 6.5e-21 | TR:B2RQL2                             | 1.9e-24 | ENSP00000382118                       | 3.8e-26 |
| EGL-44            | sd-PK                  |         | Transcriptional enhancer factor TEF-1 |         | Transcriptional enhancer factor TEF-5 |         |
|                   | CG8544                 | 7.7e-69 | SW:P30051                             | 5e-68   | ENSP00000345772                       | 2.7e-71 |
| EGL-46            | nerfin-2-PA            |         | Insulinoma-associated protein 1       |         | Insulinoma-associated protein 2       |         |
|                   | CG12809                | 9.6e-34 | SW:Q63ZV0                             | 4.8e-25 | ENSP00000306523                       | 1.7e-22 |
| EGL-13            | Sox102F-PB             |         | Transcription factor SOX-13           |         | Transcription factor SOX-5            |         |
|                   | CG11153                | 6e-51   | SW:Q04891                             | 2.7e-47 | ENSP00000370788                       | 3.9e-51 |

B

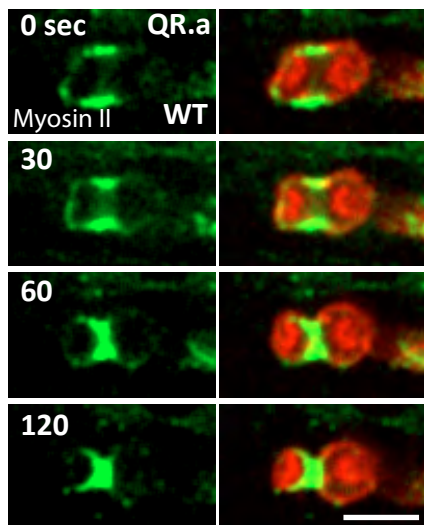

C

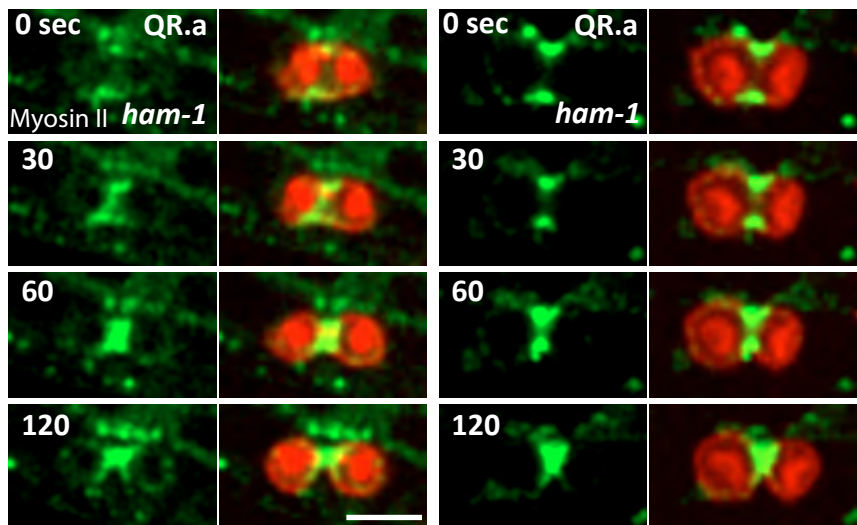

**Fig. S2. *ham-1*, *egl-44*, *egl-46* and *egl-13* homologs and myosin II asymmetry in the QR.a cell of WT and *ham-1* mutants.** (A) *ham-1*, *egl-44*, *egl-46* and *egl-13* gene homologs across species. Protein names, protein ID and BLAST E-value are shown. (B,C) Still images show the distribution of GFP-tagged non-muscle Myosin II (NMY-2) during QR.a cytokinesis in WT (asymmetry, B) and *ham-1* mutants (symmetry, two examples in C). Plasma membrane and chromosomes (red) were labeled by mCherry fused with a myristoylation signal and histone (HIS-24). Time in seconds is on the top left. Scale bars: 5  $\mu$ m.

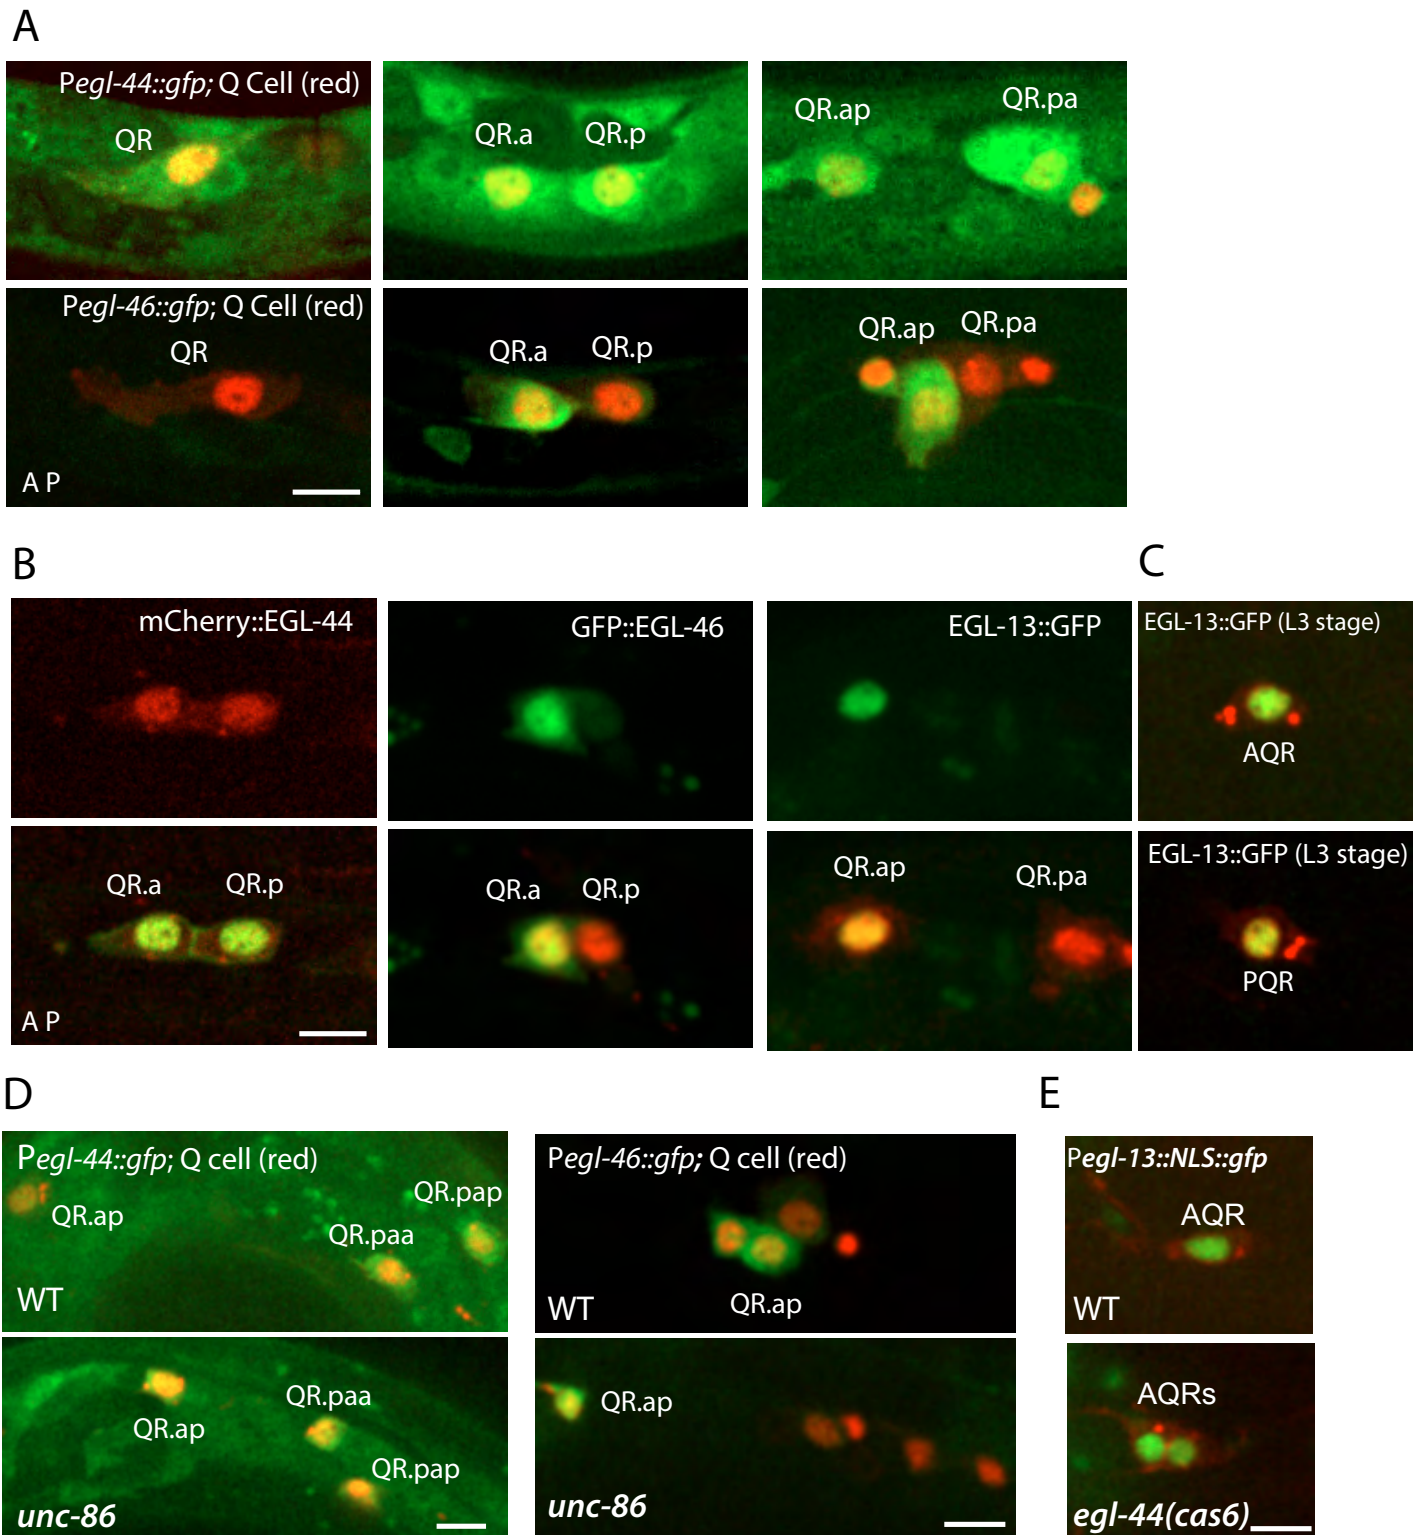

**Fig. S3. Expression and localization of EGL-44, EGL-46 and EGL-13 in WT and mutants.** (A) Still images of *Pegl-44::gfp* and *Pegl-46::gfp* expression patterns at different developmental stages of the Q neuroblast lineage. (B) Still images show the nuclear localization of EGL-44, EGL-46 and EGL-13 at the L1 larval stage. Either GFP (EGL-46 and EGL-13) or mCherry (EGL-44) was fused with the coding sequence of these TFs. Q cells were labeled with GFP (left) or mCherry (middle and right). Merged images are in the bottom row. (C) Expression of *egl-13* in AQR (top) and PQR (bottom) in the L3 larval stage. A/PQR was marked with mCherry. (D) Expression of *egl-44* (left) and *egl-46* (right) in WT (top) and *unc-86* mutants (bottom). (E) Expression of *egl-13* in AQR of WT (top) and *egl-44* mutants (bottom). Scale bars: 5  $\mu$ m.

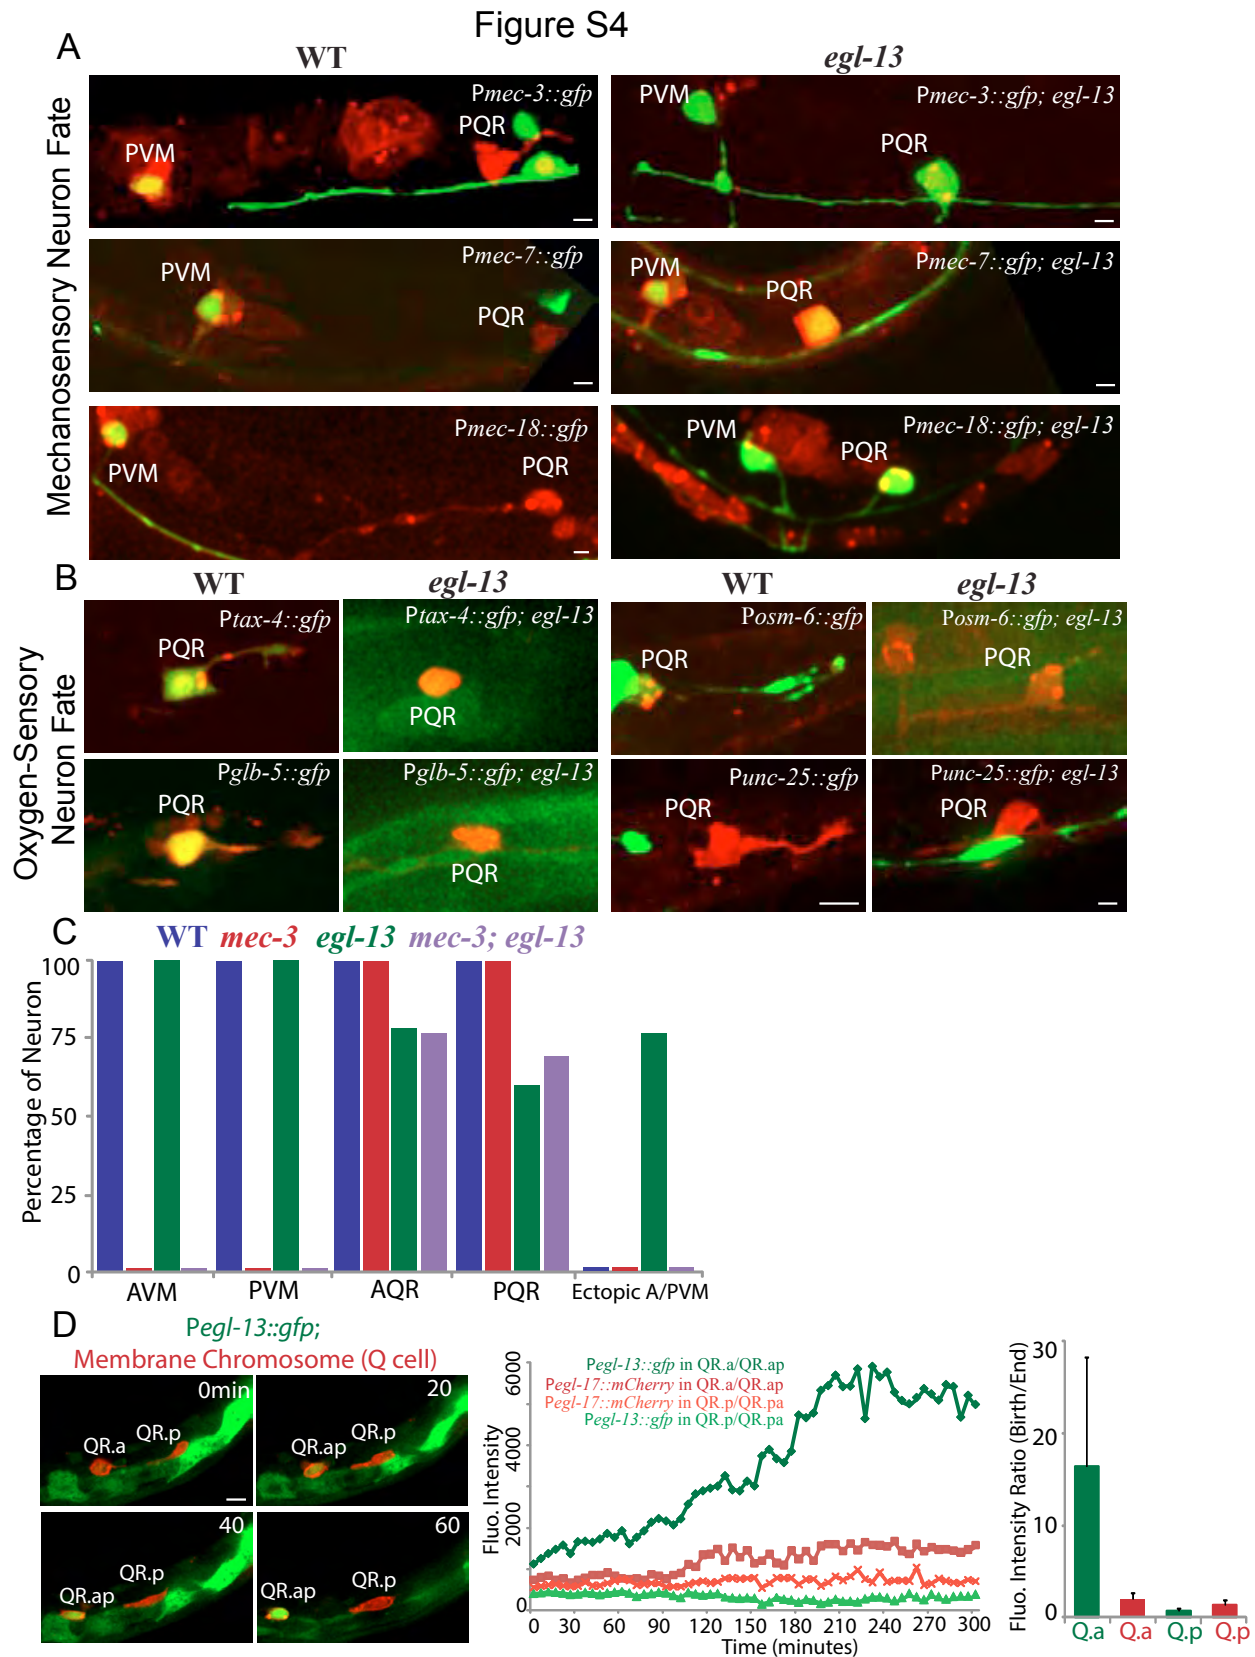

**Fig. S4. The neuronal fate in WT and *egl-13* mutants.** (A) The fate of mechanosensory neurons in WT and *egl-13* mutants. Q cell plasma membrane and chromosomes (red) were labeled by mCherry. (B) The fate of oxygen sensory neurons in WT and *egl-13* mutants. Q cells were marked by cytosolic GFP or labeled as in A with mCherry. The *unc-25* gene (bottom right) was used as a control to show that not every neuronal fate was changed in *egl-13* mutants. (C) Percentage of AVM, PVM, AQR, PQR or ectopic A/PVM in WT (blue bars), *mec-3* (red), *egl-13* (green) and *mec-3; egl-13* double mutants (purple).  $n=62-103$ . (D) Still images (left) show *egl-13* gene expression. (Middle) Quantification from the frames on the left and Movie 4. (Right) The fluorescence intensity ratio of *Pegl-13::gfp* markers in Q.a and Q.p cells at birth and at the end of their development ( $n=11$  each measurement). mCherry fluorescence in Q cells was used as an internal control. Scale bars: 5  $\mu$ m.

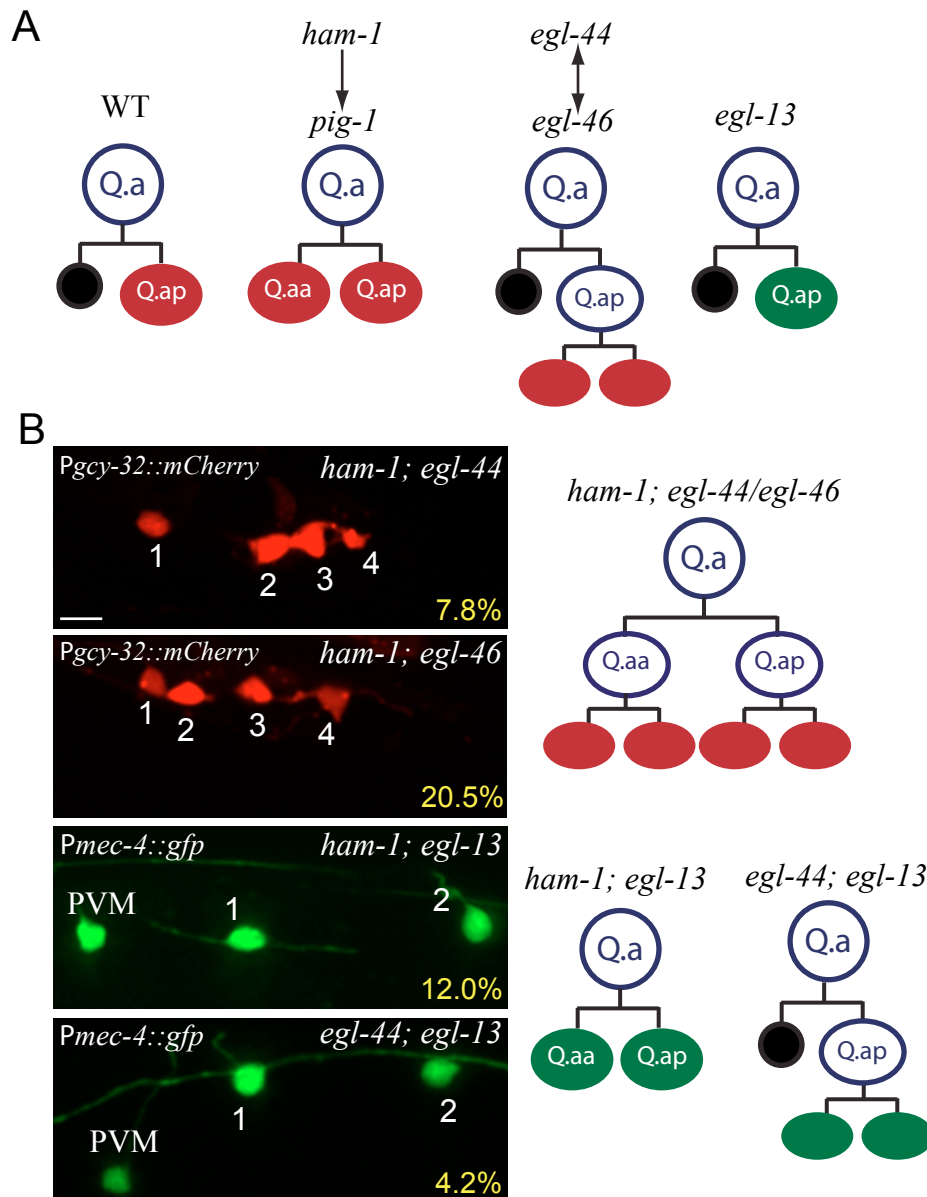

**Fig. S5. Sequential actions of TFs in Q cell lineage progression.** (A) Summary of Q.a cell phenotype in *ham-1*, *pig-1*, *egl-44*, *egl-46* and *egl-13*. Single-headed arrow shows that HAM-1 promotes *pig-1* expression. Double-headed arrow shows that EGL-44 and EGL-46 bind to each other. (B) Double-mutant phenotypes (left) and summary (right). In *ham-1; egl-44* or *ham-1; egl-46* double mutants, four cells (1-4) express *Pgcy-32::mCherry*. In *ham-1; egl-13* or *egl-44; egl-13* double mutants, two extra cells (1 and 2) express *Pmec-4::gfp*.

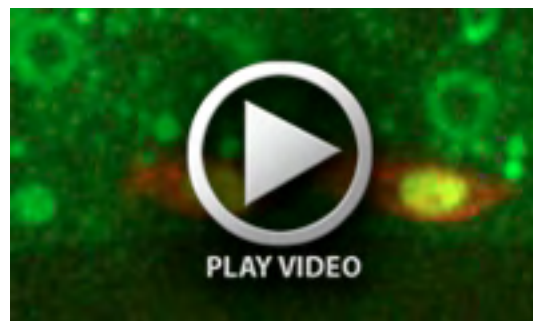

**Movie 1. HAM-1::GFP dynamics in Q.a and Q.p asymmetric cell division.** Transgenic *C. elegans* strain (GOU418) expressing GFP-tagged HAM-1 protein (green) and mCherry labeling of Q cell membrane and histone in Q cells (red). Frames were taken every 30 seconds for 40 minutes. The display rate is seven frames per second.

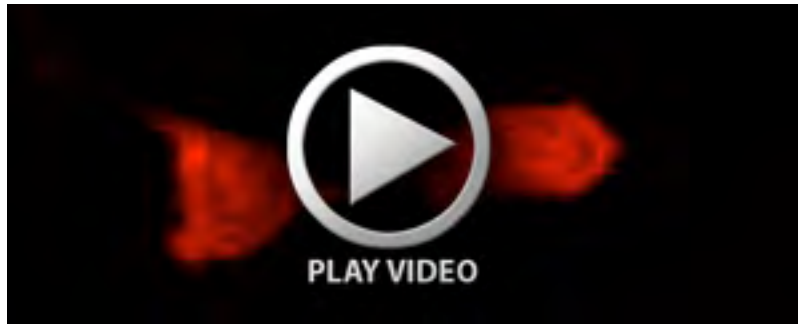

**Movie 2. An extra round of division of QR.ap in the *egl-44* mutant.** *C. elegans* strain (GOU247) expressing mCherry labels the Q cell membrane and histone in Q cells (red) in the *egl-44* mutant. Frames were taken every minute for 247 minutes. The display rate is seven frames per second.

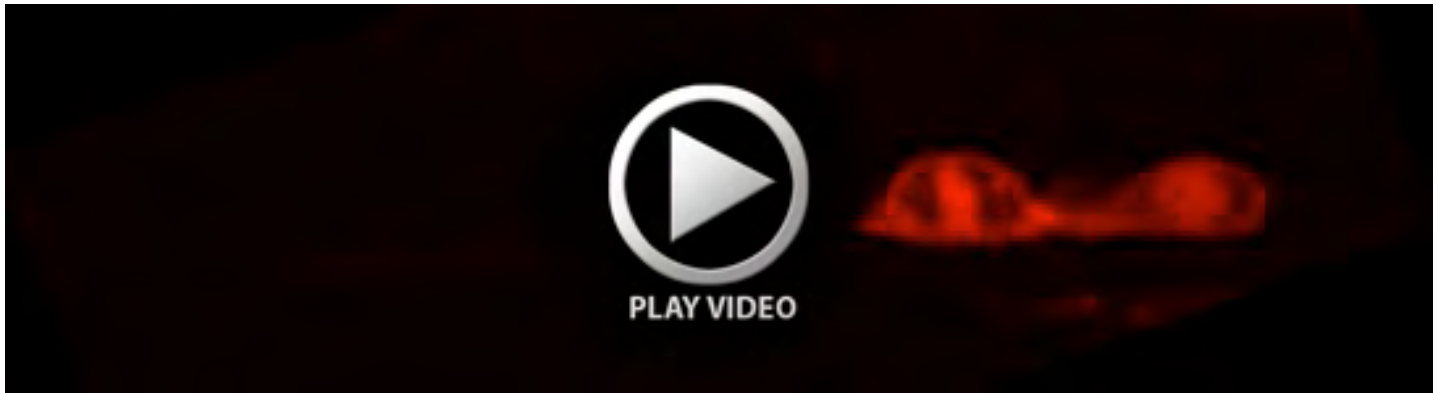

**Movie 3. An extra round of division of QR.ap in the *egl-46* mutant.** *C. elegans* strain (GOU463) expressing mCherry labels the Q cell membrane and histone in Q cells (red) in the *egl-46* mutant. Frames were taken every 30 seconds for 250 minutes. The display rate is seven frames per second.

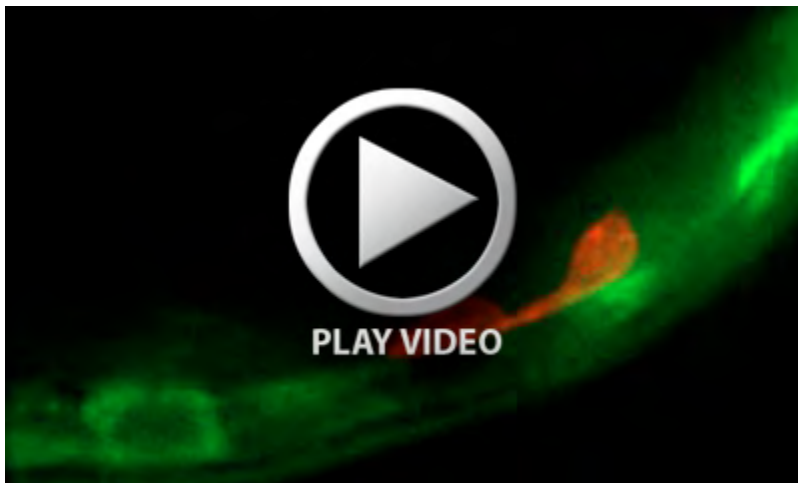

**Movie 4. The expression of GFP under the control of the *egl-13* promoter.** Transgenic *C. elegans* strain (GOU774) expressing *Pegl-13::gfp* (green) and mCherry labeling of the Q cell membrane and histone in Q cells (red). Frames were taken every minute for 131 minutes. The display rate is seven frames per second.

**Table S1. *C. elegans* strains used in this study**

| Strain | Genotype                                                                                                                                    | Method                                             | Resource           |
|--------|---------------------------------------------------------------------------------------------------------------------------------------------|----------------------------------------------------|--------------------|
| CB1338 | <i>mec-3(e1338)</i>                                                                                                                         |                                                    | CGC                |
| MH1157 | <i>him-5(e1490); egl-13(ku194)</i>                                                                                                          |                                                    | CGC                |
| MT1078 | <i>egl-13(n483)</i>                                                                                                                         |                                                    | CGC                |
| MT2247 | <i>egl-44(n1080)</i>                                                                                                                        |                                                    | CGC                |
| MT2316 | <i>egl-46(n1127)</i>                                                                                                                        |                                                    | CGC                |
| NG4531 | <i>zdis5[Pmec-4::gfp; lin-15(+)]; ham-1(gm279)</i>                                                                                          |                                                    | Gian Garriga's Lab |
| RV83   | <i>zuls45[Pnmy-2::nmy-2::gfp; unc-119(+)]; rdvls1[Pegl-17::Myri-mCherry; Pegl-17::mig-10::yfp; Pegl-17::mCherry-TEV-S::his-24; pRF4(+)]</i> |                                                    | CGC                |
| SK4005 | <i>zdis5[Pmec-4::gfp; lin-15(+)]</i>                                                                                                        |                                                    | CGC                |
| GOU127 | <i>him-5(e1490); zdis5[Pmec-4::gfp; lin-15(+)]</i>                                                                                          | Cross <i>e1490</i> with <i>zdis5</i>               | This study         |
| GOU139 | <i>egl-44(cas6); zdis5[Pmec-4::gfp; lin-15(+)]</i>                                                                                          | EMS mutagenesis and outcross and cross with GOU173 | This study         |
| GOU143 | <i>egl-13(cas10); zdis5[Pmec-4::gfp; lin-15(+)]</i>                                                                                         | EMS mutagenesis and outcross                       | This study         |
| GOU148 | <i>par-4(it47); rdvls1[Pegl-17::Myri-mCherry; Pegl-17::mig-10::yfp; Pegl-17::mCherry-TEV-S::his-24; pRF4(+)]</i>                            | Cross <i>it47</i> with <i>rdvls1</i>               | This study         |
| GOU173 | <i>casls35[Pgcy-32::mCherry; unc-76(+)]</i>                                                                                                 | Microinjection and integration                     | This study         |
| GOU174 | <i>zdis5[Pmec-4::gfp; lin-15(+)]; casls35[Pgcy-32::mCherry; unc-76(+)]</i>                                                                  | Cross <i>zdis5</i> with <i>casls35</i>             | This study         |
| GOU175 | <i>casls36[Pgcy-32::gfp; unc-76(+)]</i>                                                                                                     | Microinjection and integration                     | This study         |
| GOU194 | <i>par-4(it47); zdis5[Pmec-4::gfp; lin-15(+)]; casls35[Pgcy-32::mCherry; unc-76(+)]</i>                                                     | Cross with <i>it47; zdis5;</i>                     | This study         |

|        |                                                                                                                         |                                                    |            |
|--------|-------------------------------------------------------------------------------------------------------------------------|----------------------------------------------------|------------|
|        |                                                                                                                         | <i>casIs35</i>                                     |            |
| GOU196 | <i>par-4(it57); zdlS5[Pmec-4::gfp; lin-15(+)]; casIs35[Pgcy-32::mCherry; unc-76(+)]</i>                                 | Cross with <i>it57; zdlS5; casIs35</i>             | This study |
| GOU202 | <i>egl-46(cas16); casIs35[Pgcy-32::mCherry; unc-76(+)]</i>                                                              | EMS mutagenesis and outcross                       | This study |
| GOU210 | <i>egl-46(cas18); casIs35[Pgcy-32::mCherry; unc-76(+)]</i>                                                              | EMS mutagenesis and outcross                       | This study |
| GOU211 | <i>egl-44(cas19); casIs35[Pgcy-32::mCherry; unc-76(+)]</i>                                                              | EMS mutagenesis and outcross                       | This study |
| GOU217 | <i>zdlS5[Pmec-4::gfp; lin-15(+)]; egl-13(cas11); casIs35[Pgcy-32::mCherry; unc-76(+)]</i>                               | EMS mutagenesis and outcross                       | This study |
| GOU220 | <i>zdlS5[Pmec-4::gfp; lin-15(+)]; casIs35[Pgcy-32::mCherry; unc-76(+)]; egl-13(cas22)</i>                               | EMS mutagenesis and outcross                       | This study |
| GOU222 | <i>egl-46(cas24); zdlS5[Pmec-4::gfp; lin-15(+)]; casIs35[Pgcy-32::mCherry; unc-76(+)]</i>                               | EMS mutagenesis and outcross                       | This study |
| GOU246 | <i>him-5(e1490); zdlS5[Pmec-4::gfp; lin-15(+)]; casIs35[Pgcy-32::mCherry; unc-76(+)]</i>                                | cross <i>casIs35</i> with GOU174                   | This study |
| GOU247 | <i>egl-44(cas6); casIs22[Pegl-17::gfp-TEV-S::cmd-1, Pegl-17::Myri-mCherry; Pegl-17::mCherry-TEV-S::his-24; pRF4(+)]</i> | cross <i>cas6</i> with <i>casIs22</i>              | This study |
| GOU254 | <i>egl-44(cas6); zdlS5[Pmec-4::gfp; lin-15(+)]; casIs35[Pgcy-32::mCherry; unc-76(+)]</i>                                | Cross <i>cas6</i> with <i>casIs35</i>              | This study |
| GOU256 | <i>egl-44(cas3); zdlS5[Pmec-4::gfp; lin-15(+)]; casIs35[Pgcy-32::mCherry; unc-76(+)]</i>                                | EMS mutagenesis and outcross and cross with GOU173 | This study |



|        |                                                                                                                                                       |                                        |            |
|--------|-------------------------------------------------------------------------------------------------------------------------------------------------------|----------------------------------------|------------|
| GOU257 | <i>egl-44(n1080); lin-15(+); unc-76(+)</i> ;<br><i>zdl5[Pmec-4::gfp]; casIs35[Pgcy-32::mCherry;</i>                                                   | Cross <i>n1080</i> with GOU246         | This study |
| GOU275 | <i>rrf-3(pk1426); lin-15(+); unc-76(+)</i> ;<br><i>zdl5[Pmec-4::gfp]; casIs35[Pgcy-32::mCherry;</i>                                                   | Cross <i>pk1426;zdl5; casIs35</i>      | This study |
| GOU302 | <i>egl-13(cas11); unc-76(+); casIs22[Pegl-17::Myri-mcherry; Pegl-17::gfp::TEV-S::CMD-1; Pegl-17::mcherry::TEV-S::his-24; pRF4(+)]</i>                 | cross <i>cas11</i> with <i>casIs22</i> | This study |
| GOU354 | <i>ayIs9[Pegl-17::gfp; casIs35[Pgcy-32::mCherry; unc-76(+)]</i> ;<br><i>dpy-20(+)</i> ;                                                               | cross <i>casIs35</i> with <i>ayIs9</i> | This study |
| GOU370 | <i>egl-13(cas8); zdl5[Pmec-4::gfp; lin-15(+); casIs35[Pgcy-32::mCherry; unc-76(+)]</i>                                                                | EMS mutagenesis and outcross           | This study |
| GOU371 | <i>rdvIs1[Pegl-17::Myri-mCherry; Pegl-17::mig-10::yfp; Pegl-17::mCherry-TEV-S::his-24; pRF4(+)]</i> ;<br><i>kulS29[Pegl-13::NLS::GFP; unc-119(+)]</i> | cross <i>rdvIs1</i> with <i>kulS29</i> | This study |
| GOU375 | <i>zdl5[Pmec-4::gfp; lin-15(+); rdvIs1[Pegl-17::Myri-mCherry; Pegl-17::mig-10::yfp; Pegl-17::mCherry-TEV-S::his-24; pRF4(+)]</i>                      | Cross <i>zdl5</i> with <i>rdvIs1</i>   | This study |
| GOU376 | <i>ham-1(cas46); lin-15(+); unc-76(+)</i> ;<br><i>zdl5[Pmec-4::gfp]; casIs35[Pgcy-32::mCherry,</i>                                                    | EMS mutagenesis and outcross           | This study |
| GOU378 | <i>ham-1(cas46); casIs22[Pegl-17::gfp-TEV-S::cmd-1, Pegl-17::Myri-mCherry; Pegl-17::mCherry-TEV-S::his-24; pRF4(+)]</i>                               | Cross <i>cas46</i> with <i>casIs22</i> | This study |
| GOU381 | <i>egl-13(cas11); casEx1505[Pegl-13::egl-13::gfp; Pegl-17::myri-mCherry; Pegl-17::mCherry-TEV-S::his-24; unc-76(+)]</i> ;                             | Microinjection                         | This study |
| GOU388 | <i>ham-1(cas46); wglS102[Pham-1::ham-1::TY1::EGFP::3Xflag; unc-119(+)]</i> ;<br><i>casIs35[Pgcy-32::mCherry; unc-76(+)]</i>                           | Cross <i>cas46; wglS102; casIs35</i>   | This study |
| GOU392 | <i>egl-13(cas11); casEx553[Pglb-5::gfp; Pegl-17::Myri-mCherry; Pegl-17::mCherry-TEV-S::his-24; unc-76(+)]</i>                                         | Microinjection                         | This study |
| GOU393 | <i>egl-13(cas11); casEx551[Pgcy-36::gfp; Pegl-17::Myri-mCherry;</i>                                                                                   | Microinjection                         | This study |

|        |                                                                                                                                                                                                                                                           |                                                                              |            |
|--------|-----------------------------------------------------------------------------------------------------------------------------------------------------------------------------------------------------------------------------------------------------------|------------------------------------------------------------------------------|------------|
|        | <i>Pegl-17::mCherry-TEV-S::his-24;</i><br><i>unc-76(+)</i> ;                                                                                                                                                                                              |                                                                              |            |
| GOU394 | <i>egl-13(cas11); casEx554[Ptax-4::gfp;</i><br><i>Pegl-17::Myri-mCherry;</i><br><i>Pegl-17::mCherry-TEV-S::his-24; unc-76(+)]</i>                                                                                                                         | Microinjection                                                               | This study |
| GOU396 | <i>zdIs5[Pmec-4::gfp; lin-15(+)];</i><br><i>casIs35[Pgcy-32::mCherry; unc-76(+)];</i><br><i>egl-13(cas12)</i>                                                                                                                                             | EMS<br>mutagenesis<br>and outcross                                           | This study |
| GOU397 | <i>muls32[Pmec-7::gfp; lin-15(+)];</i><br><i>rdvIs1[Pegl-17::Myri-mCherry;</i><br><i>Pegl-17::mig-10::yfp;</i><br><i>Pegl-17::mCherry-TEV-S::his-24; pRF4]</i>                                                                                            | cross <i>rdvIs1</i><br>with <i>muls32</i>                                    | This study |
| GOU398 | <i>rdvIs1[Pegl-17::Myri-mCherry;</i><br><i>Pegl-17::mig-10::yfp;</i><br><i>Pegl-17::mCherry-TEV-S::his-24; pRF4(+)];</i><br><i>mnIs17[Posm-6::osm-6::gfp; unc-36(+)]</i>                                                                                  | cross <i>rdvIs1</i><br>with <i>mnIs17</i>                                    | This study |
| GOU406 | <i>zdIs5[Pmec-4::gfp; lin-15(+)];</i><br><i>mec-3(e1338)IV;</i><br><i>casIs35[Pgcy-32::mCherry; unc-76(+)]</i>                                                                                                                                            | cross <i>zdIs5;</i><br><i>casIs35</i> with<br><i>e1338</i>                   | This study |
| GOU407 | <i>zdIs5[Pmec-4::gfp; lin-15(+)];</i><br><i>mec-3(e1338)IV; egl-13(cas11);</i><br><i>casIs35[Pgcy-32::mCherry; unc-76(+)]</i>                                                                                                                             | cross <i>e1338</i><br>with<br><i>egl-13(cas11);</i><br><i>zdIs5; casIs35</i> | This study |
| GOU424 | <i>egl-13(cas11);</i><br><i>rdvIs1[Pegl-17::Myri-mCherry;</i><br><i>Pegl-17::mig-10::yfp;</i><br><i>Pegl-17::mCherry-TEV-S::his-24; pRF4(+)];</i><br><i>muls32[Pmec-7::gfp; lin-15(+)]</i>                                                                | cross <i>rdvIs1</i><br>with <i>muls32</i>                                    | This study |
| GOU429 | <i>casEx1506[Pmec-3::gfp;</i><br><i>Pegl-17::Myri-mCherry;</i><br><i>Pegl-17::mCherry-TEV-S::his-24;</i><br><i>unc-76(+)];</i><br><i>rdvIs1[Pegl-17::Myri-mCherry;</i><br><i>Pegl-17::mig-10::yfp;</i><br><i>Pegl-17::mCherry-TEV-S::his-24; pRF4(+)]</i> | Microinjection                                                               | This study |
| GOU430 | <i>egl-13(cas11); egl-44(cas6);</i><br><i>zdIs5[Pmec-4::gfp; lin-15(+)];</i><br><i>casIs35[Pgcy-32::mCherry; unc-76(+)];</i>                                                                                                                              | Cross <i>cas11</i><br>with <i>cas6</i>                                       | This study |
| GOU431 | <i>egl-13(cas11);</i><br><i>rdvIs1[Pegl-17::Myri-mCherry;</i><br><i>Pegl-17::mig-10::yfp;</i><br><i>Pegl-17::mCherry-TEV-S::his-24; pRF4(+)];</i><br><i>casEx1506[Pmec-3::gfp;</i><br><i>Pegl-17::Myri-mCherry;</i>                                       | Microinjection                                                               | This study |

|        |                                                                                                                                                                          |                                                     |               |
|--------|--------------------------------------------------------------------------------------------------------------------------------------------------------------------------|-----------------------------------------------------|---------------|
|        | <i>Pegl-17::mCherry-TEV-S::his-24; unc-76(+)</i>                                                                                                                         |                                                     |               |
| GOU438 | <i>egl-13(cas11);<br/>rdvls1[Pegl-17::Myri-mCherry;<br/>Pegl-17::mig-10::yfp;<br/>Pegl-17::mCherry-TEV-S::his-24; pRF4(+)];<br/>mnl17[Posm-6::osm-6::gfp; unc-36(+)]</i> | cross <i>rdvls1</i><br>with <i>mnl17</i>            | This<br>study |
| GOU444 | <i>egl-13(cas11); zdl5[Pmec-4::gfp;<br/>lin-15(+)]; rdvls1[Pegl-17::Myri-mCherry;<br/>Pegl-17::mig-10::yfp;<br/>Pegl-17::mCherry-TEV-S::his-24; pRF4(+)]</i>             | cross <i>cas11</i><br>with <i>rdvls1</i>            | This<br>study |
| GOU454 | <i>egl-13(cas11); ham-1(cas46);<br/>zdl5[Pmec-4::gfp; lin-15(+)];<br/>cas135[Pgcy-32::mCherry; unc-76(+)]</i>                                                            | cross <i>cas11</i><br>with <i>cas46</i>             | This<br>study |
| GOU463 | <i>egl-46(cas36);<br/>rdvls1[Pegl-17::Myri-mCherry;<br/>Pegl-17::mig-10::yfp;<br/>Pegl-17::mCherry-TEV-S::his-24; pRF4(+)]</i>                                           | cross <i>cas36</i><br>with <i>rdvls1</i>            | This<br>study |
| GOU464 | <i>rdvls1[Pegl-17::Myri-mCherry;<br/>Pegl-17::mig-10::yfp;<br/>Pegl-17::mCherry-TEV-S::his-24; pRF4(+)];<br/>juls76[Punc-25::GFP; lin-15(+)]</i>                         | cross <i>rdvls1</i><br>with <i>juls76</i>           | This<br>study |
| GOU465 | <i>egl-13(cas11);<br/>rdvls1[Pegl-17::Myri-mCherry;<br/>Pegl-17::mig-10::yfp;<br/>Pegl-17::mCherry-TEV-S::his-24; pRF4(+)];<br/>juls76[Punc-25GFP; lin-15(+)]</i>        | cross <i>rdvls1</i><br>with <i>juls76</i>           | This<br>study |
| GOU473 | <i>egl-46(cas36); ham-1(cas46);<br/>cas132[Pegl-17::gfp-TEV-S::cmd-1,<br/>Pegl-17::Myri-mCherry;<br/>Pegl-17::mCherry-TEV-S::his-24; pRF4(+)]</i>                        | Cross with<br><i>cas36; cas46;</i><br><i>cas132</i> | This<br>study |
| GOU477 | <i>egl-44(cas6); ham-1(cas46);<br/>cas132[Pegl-17::gfp-TEV-S::cmd-1,<br/>Pegl-17::Myri-mCherry;<br/>Pegl-17::mCherry-TEV-S::his-24; pRF4(+)]</i>                         | Cross with<br><i>cas6; cas46;</i><br><i>cas132</i>  | This<br>study |
| GOU489 | <i>zuls20[Ppar-3::par-3::ZF1::GFP;<br/>unc-119(+)];<br/>rdvls1[Pegl-17::Myri-mCherry;<br/>Pegl-17::mig-10::yfp;<br/>Pegl-17::mCherry-TEV-S::his-24; pRF4(+)]</i>         | Cross <i>zuls20</i><br>with <i>rdvls1</i>           | This<br>study |
| GOU498 | <i>ham-1(gm279); zdl5[Pmec-4::gfp;<br/>lin-15(+)]; cas135[Pgcy-32::mCherry;<br/>unc-76(+)]</i>                                                                           | Cross <i>gm279</i><br>with GOU246                   | This<br>study |

|        |                                                                                                                                                                                              |                                         |            |
|--------|----------------------------------------------------------------------------------------------------------------------------------------------------------------------------------------------|-----------------------------------------|------------|
| GOU517 | <i>ham-1(cas46); zuls45[Pnmy-2::nmy-2::gfp; unc-119(+)]; rdvls1[Pegl-17::Myri-mCherry; Pegl-17::mig-10::yfp; Pegl-17::mCherry-TEV-S::his-24; pRF4(+)]</i>                                    | Cross with <i>cas46; zuls45; rdvls1</i> | This study |
| GOU518 | <i>egl-13(cas11); casEx588[Pmec-18::gfp; Pegl-17::Myri-mCherry; Pegl-17::mCherry-TEV-S::his-24; unc-76(+)]</i>                                                                               | Microinjection                          | This study |
| GOU519 | <i>egl-13(cas11); ham-1(gm279); zdls5[Pmec-4::gfp; lin-15(+)]; casls35[Pgcy-32::mCherry; unc-76(+)]</i>                                                                                      | Cross <i>cas11</i> with <i>casls35</i>  | This study |
| GOU60  | <i>casls22[Pegl-17::gfp-TEV-S::cmd-1, Pegl-17::Myri-mCherry; Pegl-17::mCherry-TEV-S::his-24; pRF4(+)]</i>                                                                                    | Microinjection and integration          | This study |
| GOU619 | <i>egl-13(cas11); ayls9[Pegl-17::gfp; dpy-20(+); casls35[Pgcy-32::mCherry; unc-76(+)]</i>                                                                                                    | cross <i>cas11</i> with <i>ayls9</i>    | This study |
| GOU631 | <i>casEx609[Pegl-17::Sox5::gfp; Pegl-17::Myri-mCherry; Pegl-17 mCherry-TEV-S::his-24; unc-76(+)]; egl-13(cas11); zdls5[Pmec-4::gfp; lin-15(+)]; casls35[Pgcy-32::mCherry; unc-76(+)]</i>     | Microinjection                          | This study |
| GOU663 | <i>casEx609[Pegl-17::Sox5::gfp; Pegl-17::Myri-mCherry; Pegl-17 mCherry-TEV-S::his-24; unc-76(+)]; zdls5[Pmec-4::gfp; lin-15(+)]; casls35[Pgcy-32::mCherry; unc-76(+)]</i>                    | Microinjection                          | This study |
| GOU670 | <i>casEx1513[Pegl-17::egl-13::gfp; Pegl-17::Myri-mCherry; Pegl-17::mCherry-TEV-S::his-24; unc-76(+)]; zdls5[Pmec-4::gfp; lin-15(+)]; casls35[Pgcy-32::mCherry; unc-76(+)]</i>                | Microinjection                          | This study |
| GOU672 | <i>egl-13(cas11); casEx1513[Pegl-17::egl-13::gfp; Pegl-17::Myri-mCherry; Pegl-17::mCherry-TEV-S::his-24; unc-76(+)]; zdls5[Pmec-4::gfp; lin-15(+)]; casls35[Pgcy-32::mCherry; unc-76(+)]</i> | Microinjection                          | This study |
| GOU673 | <i>casEx1515[Pmec-7::egl-13::gfp; Pegl-17::Myri-mCherry; Pegl-17 mCherry-TEV-S::his-24; unc-76(+)]; zdls5[Pmec-4::gfp; lin-15(+)]; casls35[Pgcy-32::mCherry; unc-76(+)]</i>                  | Microinjection                          | This study |

|        |                                                                                                                                    |                                        |            |
|--------|------------------------------------------------------------------------------------------------------------------------------------|----------------------------------------|------------|
| GOU734 | <i>par-2(or640); casIs22[Pegl-17::gfp-TEV-S::cmd-1; Pegl-17::Myri-mCherry; Pegl-17::mCherry-TEV-S::his-24; pRF4(+)]</i>            | Cross <i>or640</i> with <i>casIs22</i> | This study |
| GOU735 | <i>par-2(or640); zdl5[Pmec-4::gfp; lin-15(+)]; casIs35[Pgcy-32::mCherry; unc-76(+)]</i>                                            | Cross with <i>or640; zdl5; casIs35</i> | This study |
| GOU739 | <i>ham-1(cas27); zdl5[Pmec-4::gfp; lin-15(+)]; casIs35[Pgcy-32::mCherry; unc-76(+)]</i>                                            | EMS mutagenesis and outcross           | This study |
| GOU740 | <i>ham-1(cas137); zdl5[Pmec-4::gfp; lin-15(+)]; casIs35[Pgcy-32::mCherry; unc-76(+)]</i>                                           | EMS mutagenesis and outcross           | This study |
| GOU764 | <i>egl-46(cas25); zdl5[Pmec-4::gfp; lin-15(+)]; casIs35[Pgcy-32::mCherry; unc-76(+)]</i>                                           | EMS mutagenesis and outcross           | This study |
| GOU765 | <i>egl-46(cas36); zdl5[Pmec-4::gfp; lin-15(+)]; casIs35[Pgcy-32::mCherry; unc-76(+)]</i>                                           | EMS mutagenesis and outcross           | This study |
| GOU766 | <i>egl-44(cas58); zdl5[Pmec-4::gfp; lin-15(+)]; casIs35[Pgcy-32::mCherry; unc-76(+)]</i>                                           | EMS mutagenesis and outcross           | This study |
| GOU767 | <i>egl-46(cas133); casIs36[Pgcy-32::gfp; unc-76(+)]</i>                                                                            | EMS mutagenesis and outcross           | This study |
| GOU768 | <i>egl-44(cas140); casIs36[Pgcy-32::gfp; unc-76(+)]</i>                                                                            | EMS mutagenesis and outcross           | This study |
| GOU769 | <i>unc-76(e911); casEX1115[Pegl-46::gfp; Pegl-17::Myri-mCherry; Pegl-17::mCherry-TEV-S::his-24; unc-76(+)]</i>                     | Microinjection                         | This study |
| GOU770 | <i>unc-76(e911); casEX1116[Pegl-44::gfp; Pegl-17::Myri-mCherry; Pegl-17::mCherry-TEV-S::his-24; unc-76(+)]</i>                     | Microinjection                         | This study |
| GOU771 | <i>unc-76(e911); casEX1118[Pegl-46::gfp-TEV-S::egl-46; Pegl-17::Myri-mCherry; Pegl-17::mCherry-TEV-S::his-24; unc-76(+)]</i>       | Microinjection                         | This study |
| GOU772 | <i>unc-76(e911); casEX1122[Pegl-17::mCherry-TEV-S::egl-44 b; Pegl-17::Myri-mCherry; Pegl-17::mCherry-TEV-S::his-24; unc-76(+)]</i> | Microinjection                         | This study |

|        |                                                                                                                                                                          |                                                 |            |
|--------|--------------------------------------------------------------------------------------------------------------------------------------------------------------------------|-------------------------------------------------|------------|
| GOU773 | <i>egl-44(cas6);<br/>casEX1125[Pegl-17::TEAD3::gfp;<br/>Pegl-17::Myri-mCherry;<br/>Pegl-17::mCherry-TEV-S::his-24; pRF4(+)]</i>                                          | Microinjection                                  | This study |
| GOU774 | <i>unc-76(e911); casEx1501[Pegl-13::gfp;<br/>Pegl-17::Myri-mCherry;<br/>Pegl-17::mCherry-TEV-S::his-24; unc-76(+)]</i>                                                   | Microinjection                                  | This study |
| GOU775 | <i>unc-76(e911);<br/>casEx1505[Pegl-13::egl-13::gfp;<br/>Pegl-17::Myri-mCherry;<br/>Pegl-17::mCherry-TEV-S::his-24; unc-76(+)]</i>                                       | Microinjection                                  | This study |
| GOU776 | <i>unc-76(e911);<br/>casEx1513[Pegl-17::egl-13::gfp;<br/>Pegl-17::Myri-mCherry;<br/>Pegl-17::mCherry-TEV-S::his-24; unc-76(+)]</i>                                       | Microinjection                                  | This study |
| GOU777 | <i>unc-76(e911);<br/>casEx1515[Pmec-7::egl-13::gfp;<br/>Pegl-17::Myri-mCherry;<br/>Pegl-17::mCherry-TEV-S::his-24; unc-76(+)]</i>                                        | Microinjection                                  | This study |
| GOU778 | <i>unc-76(e911); casEx551[Pgcy-36::gfp;<br/>Pegl-17::Myri-mCherry;<br/>Pegl-17::mCherry-TEV-S::his-24; unc-76(+)]</i>                                                    | Microinjection                                  | This study |
| GOU779 | <i>unc-76(e911); casEx553[Pglb-5::gfp;<br/>Pegl-17::Myri-mCherry;<br/>Pegl-17::mCherry-TEV-S::his-24; unc-76(+)]</i>                                                     | Microinjection                                  | This study |
| GOU780 | <i>unc-76(e911); casEx554[Ptax-4::gfp;<br/>Pegl-17::Myri-mCherry;<br/>Pegl-17::mCherry-TEV-S::his-24; unc-76(+)]</i>                                                     | Microinjection                                  | This study |
| GOU781 | <i>unc-76(e911); casEx588[Pmec-18::gfp;<br/>Pegl-17::Myri-mCherry;<br/>Pegl-17::mCherry-TEV-S::his-24; unc-76(+)]</i>                                                    | Microinjection                                  | This study |
| GOU782 | <i>unc-76(e911);<br/>casEx609[Pegl-17::Sox5::gfp;<br/>Pegl-17::Myri-mCherry;<br/>Pegl-17::mCherry-TEV-S::his-24; unc-76(+)]</i>                                          | Microinjection                                  | This study |
| GOU853 | <i>egl-44(cas6);<br/>rdvls1[Pegl-17::Myri-mCherry;<br/>Pegl-17::mig-10::yfp;<br/>Pegl-17::mCherry-TEV-S::his-24; pRF4(+)];<br/>kuls29[Pegl-13::NLS::GFP; unc-119(+)]</i> | cross <i>cas6</i> with<br><i>rdvls1; kuls29</i> | This study |
| GOU863 | <i>casEx849[pPD95.77-Ppig-1::pig-1a::GFP;<br/>Pegl-17::Myri-mCherry;<br/>Pegl-17::mCherry-TEV-S::his-24];pig-1(gm3<br/>44); zdls5[Pmec-4::gfp; lin-15(+)]</i>            | Microinjection                                  | This study |

|        |                                                                                                                                                                        |                                          |            |
|--------|------------------------------------------------------------------------------------------------------------------------------------------------------------------------|------------------------------------------|------------|
|        | <i>casIs35[Pgcy-32::mCherry; unc-76(+)]</i>                                                                                                                            |                                          |            |
| GOU868 | <i>ham-1(cas46);casEx843[Pgcy-32::pig-1a::GFP; Pegl-17::Myri-GFP; Pegl-17::GFP-TEV-S::his-24]; casIs35[Pgcy-32::mCherry; unc-76(+)]</i>                                | Microinjection                           | This study |
| GOU878 | <i>unc-86(e1416); casEX1115[Pegl-46::gfp; Pegl-17::Myri-mCherry; Pegl-17::mCherry-TEV-S::his-24; unc-76(+)]</i>                                                        | cross <i>e1416</i> with <i>casEx1115</i> | This study |
| GOU886 | <i>unc-86(e1416); casEX1116[Pegl-44::gfp; Pegl-17::Myri-mCherry, Pegl-17::mCherry-TEV-S::his-24; unc-76(+)]</i>                                                        | cross <i>e1416</i> with <i>casEx1116</i> | This study |
| GOU923 | <i>ham-1(cas46);casEx831[mec-7::pig-1a::GFP; Pegl-17::Myri-GFP; Pegl-17::GFP-TEV-S::his-24]; casIs35[Pgcy-32::mCherry; unc-76(+)]</i>                                  | Microinjection                           | This study |
| GOU924 | <i>ham-1(cas46);casEx840[Pegl-17::pig-1a::GFP; Pegl-17::Myri-GFP; Pegl-17::GFP-TEV-S::his-24]; zdIs5[Pmec-4::gfp; lin-15(+)]; casIs35[Pgcy-32::mCherry; unc-76(+)]</i> | Microinjection                           | This study |
| GOU937 | <i>egl-46(n1127); zdIs5[Pmec-4::gfp; lin-15(+)]; casIs35[Pgcy-32::mCherry; unc-76(+)]</i>                                                                              | Cross <i>n1127</i> with GOU246           | This study |
| GOU938 | <i>egl-46(cas36); casIs223[Pegl-46::gfp-TEVS::egl-46; Pegl-17::Myri-mCherry; Pegl-17::mCherry-TEV-S::his-24; unc-76(+)]</i>                                            | Cross <i>cas36</i> with <i>casIs223</i>  | This study |
| GOU939 | <i>egl-44(cas6); casIs224[Pegl-17::mCherry-TEV-S::egl-44bt ; Pegl-17::Myri-mCherry; Pegl-17::mCherry-TEV-S::his-24; unc-76(+)]</i>                                     | Cross <i>cas6</i> with <i>casIs224</i>   | This study |

**Table S2. PCR products for *C. elegans* transgenesis**

| PCR product                  | Primer 5'                                               | Primer 3'                                               | Template              |
|------------------------------|---------------------------------------------------------|---------------------------------------------------------|-----------------------|
| <i>egl-13</i> promoter       | TCACCTGCCCCGACATTA                                      | GGTACCAAGCTTGGGTCTTCG<br>TCTACGGCTCATGCTGG              | N2 genomic DNA        |
| <i>gcy-36</i> promoter       | CCTGCTTCGAAAAATCAA<br>ACTTCACAT                         | CATGGTACCAAGCTTGGGTCT<br>CTAAAATAAAAAAATTACAT<br>GATTTC | N2 genomic DNA        |
| <i>tax-4</i> promoter        | GATTTTGATATGAATCAG<br>AAATCTTGA                         | CATGGTACCAAGCTTGGGTCT<br>TCTTGAAACATAATTAATTTT<br>GAGAA | N2 genomic DNA        |
| <i>glb-5</i> promoter        | TTCCTCGCCCACGATCAC<br>ATTTATCA                          | CATGGTACCAAGCTTGGGTCT<br>TCCGTTTCCTTAATTGCAATA<br>ATTT  | N2 genomic DNA        |
| <i>mec-3</i> promoter        | TTGATCTAAAGTTCATAC<br>TAATCTG                           | CATGGTACCAAGCTTGGGTCT<br>GCCAATCCAACAGGAGTCTCT<br>AGAC  | N2 genomic DNA        |
| <i>mec-18</i> promoter       | GCACGCGGTAAGACCCC<br>CCTGGATC                           | CATGGTACCAAGCTTGGGTCT<br>GCTCACAACCTTCTTGAAGG<br>CGAG   | N2 genomic DNA        |
| <i>gfp::unc-54</i> 3'<br>UTR | AGACCCAAGCTTGGTAC<br>CATGAGTAAAGGAGAAG<br>AACTTTTCAC    | AAGGGCCCGTACGGCCGACT<br>AGTAGG                          | Plasmid               |
| <i>egl-44</i> promoter       | AAACAAATACTCTTATCT<br>CCGTTAGC                          | CATGGTACCAAGCTTGGGTCT<br>AATCTTTGAAATAAGAAGTGG<br>GTACG | Fosmid RM0612bC06     |
| <i>egl-44</i><br>gene_short  | ACATGGACAGCGGAGGT<br>GGAGGTAATATGTCGGA<br>AGACGTAGCAGTC | AATATCGCAGCTCCGCCTTTC                                   | Fosmid<br>WRM0612bC06 |



|                                             |                                                            |                                               |                                                                                   |
|---------------------------------------------|------------------------------------------------------------|-----------------------------------------------|-----------------------------------------------------------------------------------|
| <i>Pegl-44::gfp</i>                         | AAACAAATACTCTTATCT<br>CCGTTAGC                             | GGAAACAGTTATGTTTGGTAT<br>ATTGGG               | PCR product <i>egl-44</i><br>promoter and<br><i>gfp::unc-54</i> 3' UTR            |
| <i>Pegl-17::Myri-mCherry-TEV-S::egl-44b</i> | CTTCCGTTCTATGGAACA<br>CTC                                  | GACATTCTATGGAAAGTGATT<br>GAG                  | PCR product<br><i>Pegl-17::mcherry-tev</i><br>-s and <i>egl-44</i><br>gene_short  |
| <i>egl-46</i> promoter                      | TTCCAGATGTTTTCTTC<br>CG                                    | CATGGTACCAAGCTTGGGTCT<br>GGCCTTCTGAAATCAAACGA | N2 genomic DNA                                                                    |
| <i>egl-46</i> gene                          | ACATGGACAGCGGAGGT<br>GGAGGTACTATGGTGCC<br>TATGAATGACTTTTGG | GAAGACATTATCGCATCAGTT<br>ATCC                 | N2 genomic DNA                                                                    |
| <i>Pegl-46::gfp</i>                         | TTCCAGATGTTTTCTTC<br>CG                                    | GGAAACAGTTATGTTTGGTAT<br>ATTGGG               | PCR product <i>egl-46</i><br>promoter and<br><i>gfp::unc-54</i> 3' UTR            |
| <i>Pegl-46::gfp-TEVS::egl-46</i>            | TTCCAGATGTTTTCTTC<br>CG                                    | GAAGACATTATCGCATCAGTT<br>ATCC                 | PCR product <i>egl-46</i><br>promoter, <i>gfp-TEV-S</i><br>and <i>egl-46</i> gene |

**Table S3. Plasmids constructed for *C. elegans* transgenesis**

| Plasmid                            | Primer 5'                                                                     | Primer 3'                                                                       | Notes                                                                                                                                            |
|------------------------------------|-------------------------------------------------------------------------------|---------------------------------------------------------------------------------|--------------------------------------------------------------------------------------------------------------------------------------------------|
| pOG233- <i>Pegl-17::TEAD3::gfp</i> | AGCTCACATTTTCGGGC<br>ACCTGAA;<br>CCCGAAATGTGAGCT<br>ATGGCGTCCAACAGCT<br>GGAAC | ATGAGTAAAGGAG<br>AAGAACTTTTCAC;<br>TTCTCCTTTACTCAT<br>GTCTTTGACGAGCT<br>TGTAGAC | <i>TEAD3</i> coding sequence was amplified from human cDNA and inserted into <i>Pegl-17::gfp</i> plasmid via In-Fusion Advantage PCR cloning kit |
| pOG234- <i>Pegl-17::Sox5::gfp</i>  | CCCGAAATGTGAGCT<br>ATGCTTACTGACCCTGA<br>TTTA                                  | TTCTCCTTTACTCAT<br>GTTGGCTTGCCTG<br>CAATATG                                     | <i>Sox5</i> coding sequence was amplified from cDNA and inserted into <i>Pegl-17::gfp</i> plasmid via In-Fusion Advantage PCR cloning kit        |
| pOG238-pGEX-6p-1- <i>egl-44</i>    | GGATCCCAGGGGCCCC<br>TGGAA;<br>GGGCCCTGGGATCCA<br>TGAACTCAATGTTTTGT<br>TCA     | GAATCCCAGGGTTCG<br>ACTCGAG;<br>TCGACCCGGAATT<br>CTCATTATCAGAAT<br>CGCCTCC       | <i>egl-44</i> coding sequence was amplified from cDNA and inserted into pGEX-6p-1 plasmid via In-Fusion Advantage PCR cloning kit                |
| pOG241-pGADT7- <i>egl-44</i>       | AGCGTAATCTGGTACG<br>TCGTA;<br>GTACCAGATTACGCTA<br>TGAACTCAATGTTTTGT<br>TCA    | GCAGATGAATCGTA<br>GATACTGA;<br>CTACGATTATCTGC<br>TCATTATCAGAATC<br>GCCTCC       | <i>egl-44</i> coding sequence was amplified from cDNA and inserted into pGADT7 plasmid via In-Fusion Advantage PCR cloning kit                   |
| pOG242-pGBKT7- <i>egl-44</i>       | CAGGTCCTCTCTGAG<br>ATCAG;<br>TCAGAGGAGGACCTGA<br>TGAACTCAATGTTTTGT<br>TCA     | GCGGCCGCATAACT<br>AGCATAA;<br>TAGTTATGCGGCCG<br>CTCATTATCAGAAT<br>CGCCTCC       | <i>egl-44</i> coding sequence was amplified from cDNA and inserted into pGBKT7 plasmid via In-Fusion Advantage PCR cloning kit                   |
| pOG243-                            | AGCGTAATCTGGTACG                                                              | GCAGATGAATCGTA                                                                  | <i>egl-46</i> coding sequence was                                                                                                                |

|                                             |                                                                                   |                                                                                   |                                                                                                                                                |
|---------------------------------------------|-----------------------------------------------------------------------------------|-----------------------------------------------------------------------------------|------------------------------------------------------------------------------------------------------------------------------------------------|
| pGADT7- <i>egl-46</i>                       | TCGTA;<br><br>GTACCAGATTACGCTA<br>TGGTGCCTATGAATGA<br>CTTT                        | GATACTGA;<br><br>CTACGATTCATCTGC<br>TTACATTGTTGGAAT<br>AACTCT                     | amplified from cDNA and inserted into pGADT7 plasmid via In-Fusion Advantage PCR cloning kit                                                   |
| pOG244-<br>pGBKT7- <i>egl-46</i>            | CAGGTCCTCCTCTGAG<br>ATCAG;<br><br>TCAGAGGAGGACCTGA<br>TGGTGCCTATGAATGA<br>CTTT    | GCGGCCGCATAACT<br>AGCATAA;<br><br>TAGTTATGCGGCCG<br>CTTACATTGTTGGA<br>ATAACTCT    | <i>egl-46</i> coding sequence was amplified from cDNA and inserted into pGBKT7 plasmid via In-Fusion Advantage PCR cloning kit                 |
| pOG251-<br>pGADT7- <i>egl-44(1-170aa)</i>   | AGCGTAATCTGGTACG<br>TCGTA;<br><br>GTACCAGATTACGCTA<br>TGAACTCAATGTTTTGT<br>TCA    | GCAGATGAATCGTA<br>GATACTGA;<br><br>CTACGATTCATCTGC<br>CTTCTTTTTTGCTTG<br>TTCGTC   | <i>egl-44 (1-170aa)</i> coding sequence was amplified from pOG238 and inserted into pGADT7 plasmid via In-Fusion Advantage PCR cloning kit     |
| pOG252-pGADT7- <i>egl-44(171-486aa)</i>     | AGCGTAATCTGGTACG<br>TCGTA;<br><br>GTACCAGATTACGCTA<br>TGGGTGATATTCCCAG<br>TCTTCTT | GCAGATGAATCGTA<br>GATACTGA;<br><br>CTACGATTCATCTGC<br>TCATTCATCAGAATC<br>GCCTCC   | <i>egl-44 (171-486aa)</i> coding sequence was amplified from pOG238 and inserted into pGADT7 plasmid via In-Fusion Advantage PCR cloning kit   |
| pOG253-<br>pGBKT7- <i>egl-46(1-108aa)</i>   | CAGGTCCTCCTCTGAG<br>ATCAG;<br><br>TCAGAGGAGGACCTGA<br>TGGTGCCTATGAATGA<br>CTTT    | GCGGCCGCATAACT<br>AGCATAA;<br><br>TAGTTATGCGGCCG<br>CTTACGGTAGAGGA<br>CGTTTTCGAGA | <i>egl-46 (1-108aa)</i> coding sequence was amplified from human cDNA and inserted into pOG239 plasmid via In-Fusion Advantage PCR cloning kit |
| pOG254-<br>pGBKT7- <i>egl-46(109-286aa)</i> | CAGGTCCTCCTCTGAG<br>ATCAG;<br><br>GTACCAGATTACGCTA                                | GCGGCCGCATAACT<br>AGCATAA;<br><br>CTACGATTCATCTGC                                 | <i>egl-46 (109-286aa)</i> coding sequence was amplified from pOG242 and inserted into pGBKT7 plasmid via                                       |

|                                                 |                                                                            |                                                                              |                                                                                                                                                        |
|-------------------------------------------------|----------------------------------------------------------------------------|------------------------------------------------------------------------------|--------------------------------------------------------------------------------------------------------------------------------------------------------|
|                                                 | TGAACTCAATGTTTTGT<br>TCA                                                   | CTAACCAGACAAGT<br>CGGAAAGGGA                                                 | In-Fusion Advantage PCR cloning kit                                                                                                                    |
| pOG255-<br>pGADT7- <i>TEAD3</i>                 | AGCGTAATCTGGTACG<br>TCGTA;<br>GTACCAGATTAGCTAT<br>GGCGTCCAACAGCTGG<br>AAC  | GCAGATGAATCGTA<br>GATACTGA;<br>CTACGATTCATCTGC<br>GTCTTTGACGAGCT<br>TGTAGAC  | <i>TEAD3</i> coding sequence was amplified from human cDNA and inserted into pGADT7 plasmid via In-Fusion Advantage PCR cloning kit                    |
| pOG279-pET-28a- <i>egl-46</i>                   | TCGAGTGCGGCCGCAA<br>GCTTG;<br>TGCGGCCGCACTCGAA<br>TGGTGCCTATGAATGA<br>CTTT | GCACCACCACCACC<br>ACCACTGA;<br>TGGTGGTGGTGGTG<br>CCCCATTGTTGGAA<br>TAACTCTGA | <i>egl-46</i> coding sequence was amplified from cDNA and inserted into pET-28a(+) plasmid via In-Fusion Advantage PCR cloning kit                     |
| pOG821-pPD95.77-<br><i>pig-1a::gfp</i>          | GTACCGGTAGAAAAA<br>TGAGCAAGTATGAAGT<br>GCTCC                               | TTCTCCTTTACTCAT<br>TTCGATTTTCGCCAT<br>TTGAAG                                 | <i>pig-1a</i> cDNA was amplified from cDNA and inserted into pPD95.77 via In-Fusion Advantage PCR cloning kit                                          |
| pOG836-pPD95.77-<br><i>Pegl-17::pig-1a::gfp</i> | GTACCGGTAGAAAAAC<br>AGATGGATGTTTACTG<br>CCAACCTGG                          | TTCATACTTGCTCAT<br>AGCTCACATTTCCGG<br>GCACCTGAA                              | <i>Pegl-17</i> was amplified from N2 genomic DNA and inserted into pOG821-pPD95.77- <i>pig-1a::gfp</i> plasmid via In-Fusion Advantage PCR cloning kit |
| pOG837-pPD95.77-<br><i>Pmec-7::pig-1a::gfp</i>  | GTACCGGTAGAAAAAG<br>CAACATGTATGACCATT<br>TTACACG                           | TTCATACTTGCTCAT<br>GTTGCTTGAAATTT<br>GGACCC                                  | <i>Pmec-7</i> was amplified from N2 genomic DNA and inserted into pOG821-pPD95.77- <i>pig-1a::gfp</i> plasmid via In-Fusion Advantage PCR cloning kit  |
| pOG838-pPD95.77-<br><i>Pgcy-32::pig-1a::gfp</i> | GTACCGGTAGAAAAAC<br>ACATTATATACGATCG                                       | TTCATACTTGCTCAT<br>TCTATAATACAATCG                                           | <i>Pgcy-32</i> was amplified from N2 genomic DNA and                                                                                                   |

|                                                                          |                                                                                                 |                                                                                            |                                                                                                                                                                                  |
|--------------------------------------------------------------------------|-------------------------------------------------------------------------------------------------|--------------------------------------------------------------------------------------------|----------------------------------------------------------------------------------------------------------------------------------------------------------------------------------|
| <i>p</i>                                                                 | AGGC                                                                                            | TGATCTTCGC                                                                                 | inserted into pOG821-pPD95.77- <i>pig-1a::gfp</i> plasmid via In-Fusion Advantage PCR cloning kit                                                                                |
| pOG839-pPD95.77- <i>Ppig-1::pig-1a::gfp</i>                              | GTACCGGTAGAAAAA<br>GCAGCTGTGTACCGAT<br>T                                                        | TTCATACTTGCTCAT<br>GCTG                                                                    | <i>Ppig-1</i> was amplified from N2 genomic DNA and inserted into pOG821-pPD95.77- <i>pig-1a::gfp</i> plasmid via In-Fusion Advantage PCR cloning kit                            |
| pOG851-pPD95.77- <i>Ppig-1(deham-1 binding)::pig-1a::gfp</i><br><i>p</i> | TGAAAAATCTGGAAAG<br>TTCATGAAACTTCGTTT                                                           | TTCCAGATTTTCA<br>TGAAAA                                                                    | pOG821-pPD95.77- <i>pig-1a::gfp</i> was amplified using primers listed to delete the ham-1 binding site via In-Fusion Advantage PCR cloning kit                                  |
| pOG859-pPD95.77- <i>Ppig-1(de_control)::pig-1a::gfp</i>                  | TGGCCTAGTTCGGCAA<br>ACTC                                                                        | TGCCGAAGCTAGGCC<br>ATTCATTCGCGTCC<br>TGACAC                                                | pOG821-pPD95.77- <i>pig-1a::gfp</i> was amplified using primers listed to delete the control site via In-Fusion Advantage PCR cloning kit                                        |
| pOG1105- <i>Pegl-13::egl-13::gfp</i>                                     | AGTGACCTGTTTCGTTTC<br>ACCTGCCCCGACATTA;<br>AGACCCAAGCTTGTA<br>CCATGAGTAAAGGAGA<br>AGA ACTTTTCAC | GGTACCAAGCTTGG<br>GTCTTTCAGCTGTTT<br>GTAGGAG;<br>AGGTCACTAATACC<br>AAAGGGCCCGTACG<br>GCCGA | <i>Pegl-13::egl-13</i> and <i>gfp::unc-54 3'UTR</i> were amplified from N2 genomic DNA and plasmid respectively and inserted into pDONAR via In-Fusion Advantage PCR cloning kit |
| pWL30- <i>Pmec-7::egl-13::gfp</i>                                        | AGTGACCTGTTTCGTT<br>GCAACATGTATGACCA<br>TTTTACACG                                               | TCGTCTACGGCTCAT<br>GTTGCTTGAAATTT<br>GGACCCGAC                                             | <i>mec-7</i> promoter was amplified from N2 genomic DNA and inserted into                                                                                                        |

|                                   |                                                  |                                                 |                                                                                                                            |
|-----------------------------------|--------------------------------------------------|-------------------------------------------------|----------------------------------------------------------------------------------------------------------------------------|
|                                   |                                                  |                                                 | pOG1105 via In-Fusion Advantage PCR cloning kit                                                                            |
| <i>pWL32-Pegl-17::egl-13::gfp</i> | AGTGACCTGTTTCGTT<br>CTTCCGTTCTATGGAAC<br>ACTCATC | TCGTCTACGGCTCAT<br>AGCTCACATTTTCGG<br>GCACCTGAA | <i>egl-17</i> promoter was amplified from N2 genomic DNA and inserted into pOG1105 via In-Fusion Advantage PCR cloning kit |
